# Supplementary material
Source: Springer Nature journal article supplement (https://www.springermedizin.de/resource/supplementary/12885_2010_2092_MOESM9_ESM.pdf/9460508)

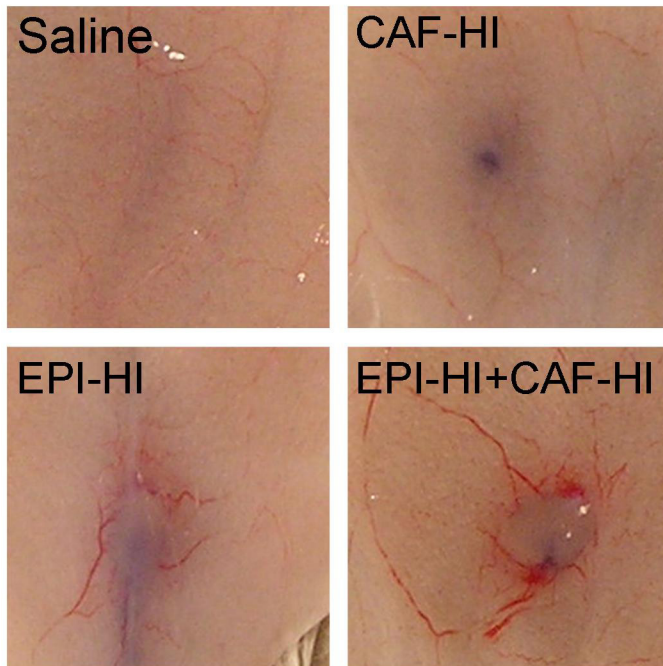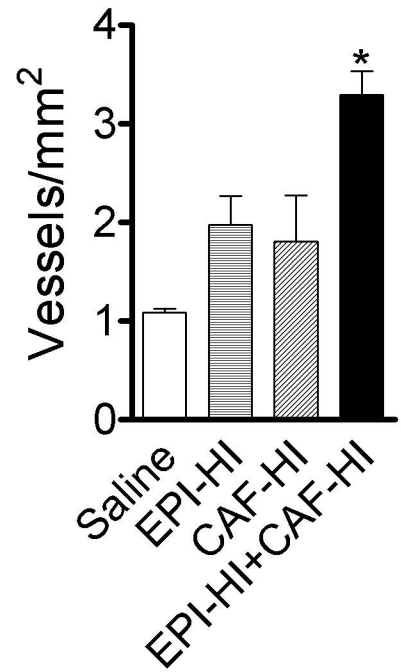

Supplement: MOESM9 [file 9460508]
